# Supplementary material
Source: publisher site journal article supplement (https://www.dovepress.com/article/132940)
Supplement: Supplementary file 1 [file get_supplementary_file.php]

|                              | Selection                        |                                 |                       | Comparability          |                                                                            | Exposure                  |                                                     |                   |               |
|------------------------------|----------------------------------|---------------------------------|-----------------------|------------------------|----------------------------------------------------------------------------|---------------------------|-----------------------------------------------------|-------------------|---------------|
|                              | Is the case definition adequate? | Representativeness of the cases | Selection of Controls | Definition of Controls | Comparability of cases and controls on the basis of the design or analysis | Ascertainment of exposure | Same method of ascertainment for cases and controls | Non-Response rate | Overall score |
| Aggio et al (2016)           | -                                | ☆                               | ☆                     | -                      | ☆                                                                          | ☆                         | ☆                                                   | -                 | 5             |
| Akune et al (2013)           | ☆                                | ☆                               | ☆                     | -                      | ☆                                                                          | -                         | ☆                                                   | -                 | 5             |
| Atkins et al (2014)          | ☆                                | ☆                               | ☆                     | -                      | ☆                                                                          | -                         | ☆                                                   | -                 | 5             |
| Beavers et al (2009)         | ☆                                | ☆                               | ☆                     | -                      | ☆                                                                          | -                         | ☆                                                   | -                 | 5             |
| Castillo et al (2003)        | ☆                                | ☆                               | ☆                     | -                      | ☆                                                                          | -                         | ☆                                                   | -                 | 5             |
| Castro et al (2014)          | ☆                                | ☆                               | ☆                     | -                      | ☆                                                                          | ☆                         | ☆                                                   | -                 | 6             |
| da Silva et al (2017)        | ☆                                | ☆                               | ☆                     | -                      | ☆                                                                          | -                         | ☆                                                   | -                 | 5             |
| Domiciano et al (2013)       | ☆                                | ☆                               | ☆                     | -                      | ☆                                                                          | ☆                         | ☆                                                   | -                 | 6             |
| Dutra et al (2015)           | -                                | ☆                               | ☆                     | -                      | ☆                                                                          | ☆                         | ☆                                                   | -                 | 5             |
| Figueiredo et al (2013)      | ☆                                | ☆                               | ☆                     | -                      | ☆                                                                          | ☆                         | ☆                                                   | -                 | 6             |
| Goodman et al (2013)         | ☆                                | ☆                               | ☆                     | -                      | ☆                                                                          | -                         | ☆                                                   | -                 | 5             |
| Kim et al (2013)             | ☆                                | ☆                               | ☆                     | -                      | ☆                                                                          | ☆                         | ☆                                                   | -                 | 6             |
| Landi et al (2012)           | ☆                                | ☆                               | ☆                     | -                      | ☆                                                                          | ☆                         | ☆                                                   | -                 | 6             |
| Lau et al (2005)             | ☆                                | ☆                               | ☆                     | -                      | ☆                                                                          | -                         | ☆                                                   | -                 | 5             |
| Lin et al (2013)             | ☆                                | ☆                               | ☆                     | -                      | ☆                                                                          | -                         | ☆                                                   | -                 | 5             |
| Martinez et al (2015)        | -                                | ☆                               | ☆                     | -                      | ☆                                                                          | -                         | ☆                                                   | -                 | 4             |
| Murphy et al (2013)          | ☆                                | ☆                               | ☆                     | -                      | ☆                                                                          | -                         | ☆                                                   | -                 | 5             |
| Park et al (2013)            | ☆                                | ☆                               | ☆                     | -                      | ☆                                                                          | ☆                         | ☆                                                   | -                 | 6             |
| Rolland et al (2009)         | ☆                                | ☆                               | ☆                     | -                      | ☆                                                                          | -                         | ☆                                                   | -                 | 5             |
| Ryu et al (2013)             | ☆                                | ☆                               | ☆                     | -                      | ☆                                                                          | ☆                         | ☆                                                   | -                 | 6             |
| Silva Alexandre et al (2013) | -                                | ☆                               | ☆                     | -                      | ☆                                                                          | ☆                         | ☆                                                   | -                 | 5             |
| Tramontano et al (2017)      | ☆                                | ☆                               | ☆                     | -                      | ☆                                                                          | ☆                         | ☆                                                   | -                 | 6             |
| Volpato et al (2013)         | ☆                                | ☆                               | ☆                     | -                      | ☆                                                                          | -                         | ☆                                                   | -                 | 5             |
| Yo et al (2014)              | ☆                                | ☆                               | ☆                     | -                      | ☆                                                                          | ☆                         | ☆                                                   | -                 | 6             |
| Zeng et al (2016)            | ☆                                | ☆                               | ☆                     | -                      | ☆                                                                          | -                         | ☆                                                   | -                 | 5             |
