# Supplementary material
Source: publisher site journal article supplement (https://www.dovepress.com/article/132940)
Supplement: Supplementary file 2 [file get_supplementary_file.php]

## Excluded papers

## Reviews

1. Aagaard P, Suetta C, Caserotti P, Magnusson SP, Kjær M. Role of the nervous system in sarcopenia and muscle atrophy with aging: strength training as a countermeasure. *Scand J Med Sci Sports*. 2010;20(1):49-64.
2. Angulo J, El Assar M, Rodríguez-Mañás L. Frailty and sarcopenia as the basis for the phenotypic manifestation of chronic diseases in older adults. *Mol Aspects Med*. 2016;50:1-32.
3. Bales CW, Ritchie CS. Sarcopenia, weight loss, and nutritional frailty in the elderly. *Annu Rev Nutr*. 2002;22(1):309.
4. Brotto M. Lessons from the FNIH-NIA-FDA sarcopenia consensus summit. *IBMS Bonekey*. 2012;9(11):210.
5. Burton LA, McMurdo MET, Struthers AD. Mineralocorticoid antagonism: a novel way to treat sarcopenia and physical impairment in older people? *Clin Endocrinol (Oxf)*. 2011;75(6):725-729.
6. Cerullo F, Gambassi G, Cesari M. Rationale for antioxidant supplementation in sarcopenia. *J Aging Res*. 2012:1-8.
7. Cruz-Jentoft AJ, Landi F. Sarcopenia. *Clin Med*. 2014;14(2):183-186.
8. Di Tano G, Fulle S, Pietrangelo T, Bellomo R, Fanò G. Sarcopenia: characteristics, genesis, remedies. *Sport Sci Health*. 2005;1(2):69-74.
9. Dodds R, Sayer AA. Sarcopenia and frailty: new challenges for clinical practice. *Clin Med*. 2016;16(5):455-458.
10. Dodds RM, Roberts HC, Cooper C, Sayer AA. The epidemiology of sarcopenia. *J Clin Densitom*. 2015;18(4):461-466.
11. Eyigör S, Kutsal Y. Reason of progressive loss of function and frailty in elderly: Sarcopenia. *Turk Geriatri Dergisi*. 2013;16(4):454-463.
12. Farshidfar F, Shulgina V, Myrie SB. Nutritional supplementations and administration considerations for sarcopenia in older adults. *Nutrition and Aging*. 2015;3(2-4):147-170.
13. Freiburger E, Sieber C, Pfeifer K. Physical activity, exercise, and sarcopenia - future challenges. *Wien Med Wochenschr (1946)*. 2011;161(17-18):416-425.
14. Greig CA. Nutritional approaches to the management of sarcopenia. *Nutr Bull*. 2013;38(3):344-348.
15. Hak Chul J. Sarcopenia, frailty, and diabetes in older adults. *Diabetes Metab J*. 2016;40(3):182-189.
16. Hyung-Min J, Jun H, Ye-Yeon W. Sarcopenia and osteoporosis. *Hip Pelvis*. 2015;27(2):72-76.
17. Chen L-K, Lee W-J, Peng L-N, Liu L-K, Arai H, Akishita M. Recent advances in sarcopenia research in Asia: 2016 update from the Asian Working Group for Sarcopenia. *J Am Med Dir Assoc*. 2016;17(8):e767.

18. Iolascon G, Di Pietro G, Gimigliano F, et al. Physical exercise and sarcopenia in older people: position paper of the Italian Society of Orthopaedics and Medicine (OrtoMed). *Clin Rev Bone Miner Metab*. 2014;11(3):215-221.
19. J. Vandewoude MF, Alish CJ, Sauer AC, Hegazi RA. Malnutrition-sarcopenia syndrome: is this the future of nutrition screening and assessment for older adults? *J Aging Res*. 2012:1-8.
20. Janssen I. Evolution of sarcopenia research. *Appl Physiol Nutr Metab*. 2010;35(5):707-712.
21. Kamel HK. Sarcopenia and aging. *Nutr Rev*. 2003;61(5):157.
22. Kamel HK, Maas D, Duthie EHJ. Role of hormones in the pathogenesis and management of sarcopenia. *Drugs Aging*. 2002;19(11):865-877.
23. Karakelides H, Nair KS. Sarcopenia of aging and its metabolic impact. *Curr Top Dev Biol*. 2005;68:123-148.
24. Kunihiro S, Akihiko Y. Novel intriguing strategies attenuating to sarcopenia. *J Aging Res*. 2012:1-11.
25. Kyoung Min K, Soo L, Hak Chul J, et al. Sarcopenia in Korea: prevalence and clinical aspects. *J Korean Geriatr Soc*. 2015;19(1):1-8.
26. Kyung Mook C. Sarcopenia and sarcopenic obesity. *Endocrinol Metab (Seoul)*. 2013;28(2):86-89.
27. Lamb S. Sarcopenia and some simple approaches to modifying the consequence of ageing. *Clin Med*. 2011;11(2):170-172.
28. Lauretani F, Bautmans I, De Vita F, Nardelli A, Ceda GP, Maggio M. Identification and treatment of older persons with sarcopenia. *Aging Male*. 2014;17(4):199-204.
29. Laviano A, Gori C, Rianda S. Chapter three - sarcopenia and nutrition. *Adv Food Nutr Res*. 2014;71:101-136.
30. Merlini L, Bonaldo P, Marzetti E. Editorial: Pathophysiological mechanisms of sarcopenia in aging and in muscular dystrophy: a translational approach. *Front Aging Neurosci*. 2015;7:153.
31. Morley JE, Baumgartner RN, Roubenoff R, Mayer J, Nair KS. Sarcopenia. *J Lab Clin Med*. 2001;137(4):231-243.
32. Palmio J, Udd B. Borderlines between sarcopenia and mild late-onset muscle disease. *Front Aging Neurosci*. 2014;6:1-5.
33. Papalia R, Zampogna B, Torre G, et al. Sarcopenia and its relationship with osteoarthritis: risk factor or direct consequence? *Musculoskelet Surg*. 2014;98(1):9-14.
34. Pillard F, Laoudj-Chenivesse D, Carnac G, et al. Physical activity and sarcopenia. *Clin Geriatr Med*. 2011;27(3):449-470.
35. Reijnierse EM, Trappenburg MC, Blauw GJ, et al. Common ground? The concordance of sarcopenia and frailty definitions. *J Am Med Dir Assoc*. 2016;17(4):24.
36. Roberts H, Lowry A, Sayer A. Assessment and management of older people with sarcopenia. *Nurs Older People*. 2014;26(5):18-22.

37. Robinson S, Cooper C, Aihie Sayer A. Nutrition and sarcopenia: a review of the evidence and implications for preventive strategies. *J Aging Res.* 2012;1-6.
38. Rom O, Kaisari S, Aizenbud D, Reznick AZ. Lifestyle and sarcopenia--etiology, prevention, and treatment. *Rambam Maimonides Med J.* 2012;3(4):1-12.
39. Rom O, Kaisari S, Aizenbud D, Reznick AZ. Sarcopenia and smoking: a possible cellular model of cigarette smoke effects on muscle protein breakdown. *Ann N Y Acad Sci.* 2012;1259(1):47-53.
40. Rondanelli M, Perna S, Faliva MA, Peroni G, Infantino V, Pozzi R. Novel insights on intake of meat and prevention of sarcopenia: all reasons for an adequate consumption. *Nutr Hosp.* 2015;32(5):2136-2143.
41. Roubenoff R. Sarcopenia and its implications for the elderly. *Eur J Clin Nutr.* 2000;54:S40-S47.
42. Roubenoff R. Origins and clinical relevance of sarcopenia. *Can J Appl Physiol.* 2001;26(1):78-89.
43. Rubbieri G, Mossello E, Di Bari M. Techniques for the diagnosis of sarcopenia. *Clin Cases Miner Bone Metab.* 2014;11(3):181-184.
44. Sakuma K, Aoi W, Yamaguchi A. The intriguing regulators of muscle mass in sarcopenia and muscular dystrophy. *Front Aging Neurosci.* 2014;6:1-17.
45. Santilli V, Bernetti A, Mangone M, Paoloni M. Clinical definition of sarcopenia. *Clin Cases Miner Bone Metab.* 2014;11(3):177-180.
46. Sayer AA, Cooper C. Aging, sarcopenia and the life-course. *Rev Clin Gerontol.* 2006;16(4):265-274.
47. Seung Won P. Sarcopenia and neurosurgery. *J Korean Neurosurg Soc.* 2014;56(2):79-85.
48. Visser M. Obesity, sarcopenia and their functional consequences in old age. *Proc Nutr Soc.* 2011;70(1):114-118.
49. von Haehling S, Morley JE, Anker SD. An overview of sarcopenia: facts and numbers on prevalence and clinical impact. *J Cachexia Sarcopenia Muscle.* 2010;1(2):129-133.
50. von Haehling S, Morley JE, Anker SD. From muscle wasting to sarcopenia and myopenia: update 2012. *J Cachexia Sarcopenia Muscle.* 2012;3(4):213-217.
51. Welle S. Cellular and molecular basis of age-related sarcopenia. *Can J Appl Physiol.* 2002;27(1):19-41.
52. Willardson JM. Sarcopenia and exercise: mechanisms, interactions, and application of research findings. *Strength Cond J.* 2004;26(6):26-31.
53. Wu Y-H, Hwang A-C, Liu L-K, Peng L-N, Chen L-K. Sex differences of sarcopenia in Asian populations: The implications in diagnosis and management. *Journal of Clinical Gerontology and Geriatrics.* 2016;7(2):37-43.

## Papers excluded after assessing for eligibility

1. Abe T, Thiebaud R, Loenneke J, Loftin M, Fukunaga T. Prevalence of site-specific thigh sarcopenia in Japanese men and women. *Age*. 2014;36(1):417-426.
2. Akın S, Mucuk S, Öztürk A, et al. Muscle function-dependent sarcopenia and cut-off values of possible predictors in community-dwelling Turkish elderly: calf circumference, midarm muscle circumference and walking speed. *Eur J Clin Nutr*. 2015;69(10):1087-1090.
3. Alva MdCV, Camacho MEI, Velázquez JD, Lazarevich I. The relationship between sarcopenia, undernutrition, physical mobility and basic activities of daily living in a group of elderly women of Mexico City. *Nutr Hosp*. 2013;28(2):514-521.
4. Arango-Lopera VE, Arroyo P, Gutierrez-Robledo LM, Perez-Zepeda MU, Cesari M. Mortality as an adverse outcome of sarcopenia. *J Nutr Health Aging*. 2013;17(3):259-262.
5. Assantachai P, Muangpaisan W, Intalaporn S, Sitthichai K, Udompunturak S. Cut-off points of quadriceps strength, declines and relationships of sarcopenia-related variables among Thai community-dwelling older adults. *Geriatr Gerontol Int*. 2014;14:61-68.
6. Aubertin-Leheudre M, Audet M, Goulet EDB, Dionne IJ. HRT provides no additional beneficial effect on sarcopenia in physically active postmenopausal women: a cross-sectional, observational study. *Maturitas*. 2005;51(2):140-145.
7. Aurelia PL, Gabriela D, Valer D. Sarcopenia: diagnosis, stages and treatment. *Balneo Research Journal*. 2015;6(1):32-35.
8. Auyeung TW, Lee JS, Leung J, Kwok T, Woo J. Adiposity to muscle ratio predicts incident physical limitation in a cohort of 3,153 older adults--an alternative measurement of sarcopenia and sarcopenic obesity. *Age*. 2013;35(4):1377-1385.
9. Bahat G, Tufan F, Bahat Z, et al. Assessments of functional status, comorbidities, polypharmacy, nutritional status and sarcopenia in Turkish community-dwelling male elderly. *Aging Male*. 2013;16(2):67-72.
10. Barichella M, Pinelli G, Iorio L, et al. Sarcopenia and dynapenia in patients with parkinsonism. *J Am Med Dir Assoc*. 2016;17(7):640-646.
11. Bastiaanse LP, Hilgenkamp TIM, Echteld MA, Evenhuis HM. Prevalence and associated factors of sarcopenia in older adults with intellectual disabilities. *Res Dev Disabil*. 2012;33(6):2004-2012.
12. Batsis JA, Barre LK, Mackenzie TA, Pratt SI, Lopez-Jimenez F, Bartels SJ. Variation in the prevalence of sarcopenia and sarcopenic obesity in older adults associated with different research definitions: dual-energy x-ray absorptiometry data from the National Health and Nutrition Examination Survey 1999-2004. *J Am Geriatr Soc*. 2013;61(6):974-980.
13. Batsis JA, Mackenzie TA, Barre LK, Lopez-Jimenez F, Bartels SJ. Sarcopenia, sarcopenic obesity and mortality in older adults: Results from the National Health and Nutrition Examination Survey III. *Eur J Clin Nutr*. 2014;68(9):1001-1007.

14. Batsis JA, Mackenzie TA, Lopez-Jimenez F, Bartels SJ. Sarcopenia, sarcopenic obesity, and functional impairments in older adults: National Health and Nutrition Examination Surveys 1999-2004. *Nutr Res.* 2015;35(12):1031-1039.
15. Beaudart C, Edwards M, Moss C, et al. English translation and validation of the SarQoL(R), a quality of life questionnaire specific for sarcopenia. *Age Ageing.* 2016;27:27.
16. Beaudart C, Reginster JY, Petermans J, et al. Quality of life and physical components linked to sarcopenia: The SarcoPhAge study. *Exp Gerontol.* 2015;69:103-110.
17. Bergen Iii HR, Farr JN, Vanderboom PM, et al. Myostatin as a mediator of sarcopenia versus homeostatic regulator of muscle mass: insights using a new mass spectrometry-based assay. *Skelet Muscle.* 2015;5(1):1-16.
18. Bijlsma A, Meskers C, Eshof N, et al. Diagnostic criteria for sarcopenia and physical performance. *Age.* 2014;36(1):275-285.
19. Bijlsma A, Meskers C, Heemst D, Westendorp R, Craen A, Maier A. Diagnostic criteria for sarcopenia relate differently to insulin resistance. *Age.* 2013;35(6):2367-2375.
20. Bijlsma A, Meskers C, Ling C, et al. Defining sarcopenia: the impact of different diagnostic criteria on the prevalence of sarcopenia in a large middle aged cohort. *Age.* 2013;35(3):871-881.
21. Bjorkman MP, Suominen MH, Pitkälä KH, Finne-Sover HU, Tilvis RS. Porvoo sarcopenia and nutrition trial: effects of protein supplementation on functional performance in home-dwelling sarcopenic older people - study protocol for a randomized controlled trial. *Trials.* 2013;14(1):1-14.
22. Bryant RV, Ooi S, Schultz CG, et al. Low muscle mass and sarcopenia: common and predictive of osteopenia in inflammatory bowel disease. *Aliment Pharmacol Ther.* 2015;41(9):895-906.
23. Bua EA, McKiernan SH, Wanagat J, McKenzie D, Aiken JM. Mitochondrial abnormalities are more frequent in muscles undergoing sarcopenia. *J Appl Physiol.* 1985;92(6):2617-2624.
24. Buchmann N, Nikolov J, Spira D, et al. Identifying sarcopenia in metabolic syndrome: data from the Berlin Aging Study II. *J Gerontol A Biol Sci Med Sci.* 2016;71(2):265-272.
25. Campbell T, Vallis L. Predicting fat-free mass index and sarcopenia in assisted-living older adults. *Age.* 2014;36(4):1-13.
26. Campbell WW. Synergistic use of higher-protein diets or nutritional supplements with resistance training to counter sarcopenia. *Nutr Rev.* 2007;65(9):416-422.
27. Cawthon PM, Blackwell TL, Cauley J, et al. Evaluation of the usefulness of consensus definitions of sarcopenia in older men: results from the Observational Osteoporotic Fractures in Men Cohort Study. *J Am Geriatr Soc.* 2015;63(11):2247-2259.
28. Coin A, Perissinotto E, Enzi G, et al. Predictors of low bone mineral density in the elderly: the role of dietary intake, nutritional status and sarcopenia. *Eur J Clin Nutr.* 2008;62(6):802-809.

29. Coto-Montes A, Boga JA, Tan DX, Reiter RJ. Melatonin as a potential agent in the treatment of sarcopenia. *Int J Mol Sci.* 2016;17(10):1-15.
30. Delmonico MJ, Harris TB, Lee J-S, et al. Alternative definitions of sarcopenia, lower extremity performance, and functional impairment with aging in older men and women. *J Am Geriatr Soc.* 2007;55(5):769-774.
31. Dietzel R, Felsenberg D, Armbrecht G. Mechanography performance tests and their association with sarcopenia, falls and impairment in the activities of daily living - a pilot cross-sectional study in 293 older adults. *J Musculoskelet Neuronal Interact.* 2015;15(3):249-256.
32. Doğan SC, Hizmetli S, Hayta E, Kaptanoğlu E, Erselcan T, Güler E. Sarcopenia in women with rheumatoid arthritis. *Eur J Rheumatol.* 2015;2(2):57-61.
33. Domański M, Ciechanowski K. Sarcopenia: A major challenge in elderly patients with end-stage renal disease. *J Aging Res.* 2012:1-12.
34. Dorosty A, Arero G, Chamar M, Tavakoli S. Prevalence of sarcopenia and its association with socioeconomic status among the elderly in Tehran. *Ethiop J Health Sci.* 2016;26(4):389-396.
35. El Maghraoui A, Ebo'o FB, Sadni S, Majjad A, Hamza T, Mounach A. Is there a relation between pre-sarcopenia, sarcopenia, cachexia and osteoporosis in patients with ankylosing spondylitis? *BMC Musculoskelet Disord.* 2016;17:1-8.
36. Esper RC, Bermejo JM, Pérez CP, Cortés UGC. Frailty and sarcopenia. *Rev Fac Med Univ Nac Auton Mex.* 2011;54(5):12-21.
37. Fiatarone Singh MA, Singh NA, Hansen RD, et al. Methodology and baseline characteristics for the Sarcopenia and Hip Fracture study: a 5-year prospective study. *J Gerontol A Biol Sci Med Sci.* 2009;64(5):568-574.
38. Filippin LI. Tracking sarcopenia in primary health: be an utopia?. *Rev Inspirar Mov Saude.* 2015;7(3):3-5.
39. Frost M, Nielsen TL, Brixen K, Andersen M. Peak muscle mass in young men and sarcopenia in the ageing male. *Osteoporos Int.* 2014;26(2):749-756.
40. Fry CS, Lee JD, Mula J, et al. Inducible depletion of satellite cells in adult, sedentary mice impairs muscle regenerative capacity without affecting sarcopenia. *Nat Med.* 2015;21(1):76-80.
41. Fülster S, von Haehling S. A prospective study of the associations between 25-hydroxyvitamin D, sarcopenia progression and physical activity in older adults. *Clin Endocrinol (Oxf).* 2011;74(1):138-138.
42. Gewandter JS, Dale W, Magnuson A, et al. Associations between a patient-reported outcome (PRO) measure of sarcopenia and falls, functional status, and physical performance in older patients with cancer. *J Geriatr Oncol.* 2015;6(6):433-441.
43. Gianoudis J, Bailey CA, Daly RM. Associations between sedentary behaviour and body composition, muscle function and sarcopenia in community-dwelling older adults. *Osteoporos Int.* 2015;26(2):571-579.
44. Goulet EDB, Lord C, Chaput J-P, Aubertin-Leheudre M, Brochu M, Dionne IJ. No difference in insulin sensitivity between healthy postmenopausal women with or without sarcopenia: a pilot study. *Appl Physiol Nutr Metab.* 2007;32(3):426-433.

45. Hairi NN, Cumming RG, Naganathan V, et al. Loss of muscle strength, mass (sarcopenia), and quality (specific force) and its relationship with functional limitation and physical disability: the Concord Health and Ageing in Men Project. *J Am Geriatr Soc.* 2010;58(11):2055-2062.
46. Halil M, Ulger Z, Varlı M, et al. Sarcopenia assessment project in the nursing homes in Turkey. *Eur J Clin Nutr.* 2014;68(6):690-694.
47. Hashemi R, Motlagh AD, Heshmat R, et al. Diet and its relationship to sarcopenia in community dwelling Iranian elderly: a cross sectional study. *Nutrition.* 2015;31(1):97-104.
48. Hayashi F, Matsumoto Y, Momoki C, et al. Physical inactivity and insufficient dietary intake are associated with the frequency of sarcopenia in patients with compensated viral liver cirrhosis. *Hepatol Res.* 2013;43(12):1264-1275.
49. He H, Liu Y, Tian Q, Papasian CJ, Hu T, Deng HW. Relationship of sarcopenia and body composition with osteoporosis. *Osteoporos Int.* 2016;27(2):473-482.
50. Hedayati KK, Dittmar M. Prevalence of sarcopenia among older community-dwelling people with normal health and nutritional state. *Ecol Food Nutr.* 2010;49(2):110-128.
51. Hirani V, Naganathan V, Blyth F, et al. Low hemoglobin concentrations are associated with sarcopenia, physical performance, and disability in older Australian men in cross-sectional and longitudinal analysis: the Concord Health and Ageing in Men Project. *J Gerontol A Biol Sci Med Sci.* 2016;71(12):1667-1675.
52. Hong HC, Hwang SY, Choi HY, et al. Relationship between sarcopenia and nonalcoholic fatty liver disease: the Korean Sarcopenic Obesity Study. *Hepatology (Baltimore, Md.).* 2014;59(5):1772-1778.
53. Hong N, Lee EY, Kim CO. Gamma-glutamyl transferase is associated with sarcopenia and sarcopenic obesity in community-dwelling older adults: results from the Fifth Korea National Health and Nutrition Examination Survey, 2010-2011. *Endocr J.* 2015;62(7):585-592.
54. Hong W, Cheng Q, Zhu X, et al. Prevalence of sarcopenia and its relationship with sites of fragility fractures in elderly Chinese men and women. *PLoS One.* 2015;10(9):1-10.
55. Hotta C, Hiraki K, Wakamiya A, et al. Relation of physical function and physical activity to sarcopenia in hemodialysis patients: A preliminary study. *Int J Cardiol.* 2015;191:198-200.
56. Hsu Y-H, Liang C-K, Chou M-Y, et al. Association of cognitive impairment, depressive symptoms and sarcopenia among healthy older men in the veterans retirement community in southern Taiwan: A cross-sectional study. *Geriatr Gerontol Int.* 2014;14:102-108.
57. Chalhoub D, Cawthon PM, Ensrud KE, et al. Risk of nonspine fractures in older adults with sarcopenia, low bone mass, or both. *J Am Geriatr Soc.* 2015;63(9):1733-1740.
58. Chavez-Moreno DV, Infante-Sierra H, Serralde-Zuniga AE. Sarcopenia and functionality in elderly inpatient. *Nutr Hosp.* 2015;31(4):1660-1666.

59. Chien MY, Huang TY, Wu YT. Prevalence of sarcopenia estimated using a bioelectrical impedance analysis prediction equation in community-dwelling elderly people in Taiwan. *J Am Geriatr Soc.* 2008;56(9):1710-1715.
60. Chien M-Y, Kuo H-K, Wu Y-T. Sarcopenia, cardiopulmonary fitness, and physical disability in community-dwelling elderly people. *Phys Ther.* 2010;90(9):1277-1287.
61. Chung JH, Hwang H-J, Han CH, Son BS, Kim DH, Park MS. Association between sarcopenia and metabolic syndrome in chronic obstructive pulmonary disease: the Korea National Health and Nutrition Examination Survey (KNHANES) from 2008 to 2011. *COPD.* 2015;12(1):82-89.
62. Chung SW, Yoon JP, Oh K-S, et al. Rotator cuff tear and sarcopenia: are these related? *J Shoulder Elbow Surg.* 2016;25(9):e249-e255.
63. Iannuzzi-Sucich M, Prestwood KM, Kenny AM. Prevalence of sarcopenia and predictors of skeletal muscle mass in healthy, older men and women. *J Gerontol A Biol Sci Med Sci.* 2002;57(12):M772-M777.
64. Inhwon L, Jinkyung C, Youngyun J, Changduk H, Taehee K, Hyunsik K. body fat and physical activity modulate the association between sarcopenia and osteoporosis in elderly Korean women. *J Sport Sci Med.* 2016;15(3):477-482.
65. Ishii S, Tanaka T, Shibasaki K, et al. Development of a simple screening test for sarcopenia in older adults. *Geriatr Gerontol Int.* 2014;14:93-101.
66. Izawa KP, Watanabe S, Oka K, et al. Sarcopenia and physical activity in older male cardiac patients. *Int J Cardiol.* 2016;222:457-461.
67. Janssen I. Influence of sarcopenia on the development of physical disability: the Cardiovascular Health Study. *J Am Geriatr Soc.* 2006;54(1):56-62.
68. Janssen I, Heymsfield SB, Ross R. Low relative skeletal muscle mass (sarcopenia) in older persons is associated with functional impairment and physical disability. *J Am Geriatr Soc.* 2002;50(5):889-896.
69. Janssen I, Shepard DS, Katzmatzyk PT, Roubenoff R. The healthcare costs of sarcopenia in the United States. *J Am Geriatr Soc.* 2004;52(1):80-85.
70. Jeon YK, Shin MJ, Kim MH, et al. Low pulmonary function is related with a high risk of sarcopenia in community-dwelling older adults: the Korea National Health and Nutrition Examination Survey (KNHANES) 2008-2011. *Osteoporos Int.* 2015;26(10):2423-2429.
71. Johnston APW, De Lisio M, Parise G. Resistance training, sarcopenia, and the mitochondrial theory of aging. *Appl Physiol Nutr Metab.* 2008;33(1):191-199.
72. Kaido T, Ogawa K, Fujimoto Y, et al. Impact of sarcopenia on survival in patients undergoing living donor liver transplantation. *Am J Transplant.* 2013;13(6):1549-1556.
73. Kaido T, Tamai Y, Hamaguchi Y, et al. Effects of pretransplant sarcopenia and sequential changes in sarcopenic parameters after living donor liver transplantation. *Nutrition.* 2017;33:195-198.
74. Kawakami R, Murakami H, Sanada K, et al. Calf circumference as a surrogate marker of muscle mass for diagnosing sarcopenia in Japanese men and women. *Geriatr Gerontol Int.* 2015;15(8):969-976.



75. Kemmler W, Bebenek M, Engelke K, Stengel S. Impact of whole-body electromyostimulation on body composition in elderly women at risk for sarcopenia: the Training and Electro Stimulation Trial (TEST-III). *Age*. 2014;36(1):395-406.
76. Kemmler W, von Stengel S. Alternative exercise technologies to fight against sarcopenia at old age: a series of studies and review. *J Aging Res*. 2012:1-8.
77. Kim J, Lee Y, Kye S, Chung YS, Kim KM. Association of vegetables and fruits consumption with sarcopenia in older adults: The fourth Korea national health and nutrition examination survey. *Age and Ageing*. 2015;44(1):96-102.
78. Kim JS, Kosek DJ, Petrella JK, Cross JM, Bamman MM. Resting and load-induced levels of myogenic gene transcripts differ between older adults with demonstrable sarcopenia and young men and women. *J Appl Physiol*. 1985;99(6):2149-2158.
79. Kim NH, Kim HS, Eun CR, et al. Depression Is Associated with Sarcopenia, Not Central Obesity, in Elderly Korean Men. *J Am Geriatr Soc*. 2011;59(11):2062-2068.
80. Kim TN, Yang SJ, Yoo HJ, et al. Prevalence of sarcopenia and sarcopenic obesity in Korean adults: the Korean sarcopenic obesity study. *Int J Obes (Lond)*. 2009;33(8):885-892.
81. Kim YP, Kim S, Joh JY, Hwang HS. Effect of interaction between dynapenic component of the European working group on sarcopenia in older people sarcopenia criteria and obesity on activities of daily living in the elderly. *J Am Med Dir Assoc*. 2014;15(5):7.
82. Koo BK, Roh E, Yang YS, Moon MK. Difference between old and young adults in contribution of  $\beta$ -cell function and sarcopenia in developing diabetes mellitus. *J Diabetes Investig*. 2016;7(2):233-240.
83. Koo HK, Park JH, Park HK, Jung H, Lee SS. Conflicting role of sarcopenia and obesity in male patients with chronic obstructive pulmonary disease: Korean national health and nutrition examination survey. *PLoS One*. 2014;9(10).
84. Kruger HS, Havemann-Nel L, Ravayse C, Moss SJ, Tieland M. physical activity energy expenditure and sarcopenia in black South African urban women. *J Phys Act Health*. 2016;13(3):296-302.
85. Landi F, Cruz-Jentoft AJ, Liperoti R, et al. Sarcopenia and mortality risk in frail older persons aged 80 years and older: results from the iLSIRENTE study. *Age Ageing*. 2013;42(2):203-209.
86. Landi F, Liperoti R, Fusco D, et al. Sarcopenia and mortality among older nursing home residents. *J Am Med Dir Assoc*. 2012;13(2):121-126.
87. Landi F, Liperoti R, Russo A, et al. Association of anorexia with sarcopenia in a community-dwelling elderly population: results from the iLSIRENTE study. *Eur J Nutr*. 2013;52(3):1261-1268.
88. Landi F, Liperoti R, Russo A, et al. Sarcopenia as a risk factor for falls in elderly individuals: Results from the iLSIRENTE study. *Clin Nutr*. 2012;31(5):652-658.
89. Lawler JM, Hindle A. Living in a box or call of the wild? Revisiting lifetime inactivity and sarcopenia. *Antioxid Redox Signal*. 2011;15(9):2529-2541.

90. Lee I, Ha C, Kang H. Association of sarcopenia and physical activity with femur bone mineral density in elderly women. *J Exerc Nutrition Biochem*. 2016;20(1):23-28.
91. Lee I, Cho J, Jin Y, Ha C, Kim T, Kang H. Body fat and physical activity modulate the association between sarcopenia and osteoporosis in elderly Korean women. *J Sport Sci Med*. 2016;15(3):477-482.
92. Lee J, Han K, Song JJ, Im GJ, Chae SW. Sarcopenia and hearing loss in older Koreans: findings from the Korea National Health and Nutrition Examination Survey (KNHANES) 2010. *PLoS One*. 2016;11(3):1-9.
93. Lee JSW, Auyeung T-W, Kwok T, Lau EMC, Leung P-C, Woo J. Associated factors and health impact of sarcopenia in older Chinese men and women: a cross-sectional study. *Gerontology*. 2007;53(6):404-410.
94. Lee SG, Lee YH, Kim KJ, Lee W, Kwon OH, Kim JH. Additive association of vitamin D insufficiency and sarcopenia with low femoral bone mineral density in noninstitutionalized elderly population: The Korea National Health and Nutrition Examination Surveys 2009-2010. *Osteoporos Int*. 2013;24(11):2789-2799.
95. Lera L, Angel B, Sanchez H, et al. Validation of cut points of skeletal muscle mass index for identifying sarcopenia in Chilean older people. *Nutr Hosp*. 2014;31(3):1187-1197.
96. Liu L-K, Lee W-J, Chen L-Y, et al. Sarcopenia, and its association with cardiometabolic and functional characteristics in Taiwan: Results from I- Lan Longitudinal Aging Study. *Geriatr Gerontol Int*. 2014;14:36-45.
97. Liu L-K, Lee W-J, Liu C-L, et al. Age-related skeletal muscle mass loss and physical performance in Taiwan: Implications to diagnostic strategy of sarcopenia in Asia. *Geriatr Gerontol Int*. 2013;13(4):964-971.
98. Loenneke JP, Pujol TJ. Sarcopenia: an emphasis on occlusion training and dietary protein. *Hippokratia*. 2011;15(2):132-137.
99. Maeda K, Akagi J. Sarcopenia is an independent risk factor of dysphagia in hospitalized older people. *Geriatr Gerontol Int*. 2016;16(4):515-521.
100. Malmstrom TK, Miller DK, Simonsick EM, Ferrucci L, Morley JE. SARC-F: a symptom score to predict persons with sarcopenia at risk for poor functional outcomes. *J Cachexia Sarcopenia Muscle*. 2016;7(1):28-36.
101. Marcus RL, Addison O, Dibble LE, Bo Foreman K, Morrell G, LaStayo P. Intramuscular adipose tissue, sarcopenia, and mobility function in older individuals. *J Aging Res*. 2012:1-6.
102. Marzetti E, Lorenzi M, Antocicco M, et al. Shorter telomeres in peripheral blood mononuclear cells from older persons with sarcopenia: results from an exploratory study. *Front Aging Neurosci*. 2014;6:1-8.
103. Mei KL, Batsis JA, Mills JB, Holubar SD. Sarcopenia and sarcopenic obesity: do they predict inferior oncologic outcomes after gastrointestinal cancer surgery? *Perioper Med (Lond)*. 2016;5:1-12.
104. Meng N-H, Li C-I, Liu C-S, et al. Comparison of height- and weight-adjusted sarcopenia in a Taiwanese metropolitan older population. *Geriatr Gerontol Int*. 2015;15(1):45-53.

105. Meng N-H, Li C-I, Liu C-S, et al. Sarcopenia defined by combining height- and weight-adjusted skeletal muscle indices is closely associated with poor physical performance. *J Aging Phys Act.* 2015;23(4):597-606.
106. Meng-Yueh C, Hsu-Ko K, Ying-Tai W. sarcopenia, cardiopulmonary fitness, and physical disability in community-dwelling elderly people. *Phys Ther.* 2010;90(9):1277-1287.
107. Mijnaerends DM, Schols JM, Meijers JM, et al. Instruments to assess sarcopenia and physical frailty in older people living in a community (care) setting: similarities and discrepancies. *J Am Med Dir Assoc.* 2015;16(4):301-308.
108. Mitsuru H, Meiko A. Effects of rowing exercise on prevention of metabolic syndrome and sarcopenia for senior people. *Korean Journal of Obesity.* 2013;22(3):123-128.
109. Moon JH, Kim KM, Kim JH, et al. Predictive values of the new sarcopenia index by the Foundation for the National Institutes of Health Sarcopenia Project for Mortality among Older Korean Adults. *PLoS One.* 2016;11(11):1-13.
110. Moon SJ, Kim TH, Yoon SY, Chung JH, Hwang H-J. Relationship between Stage of Chronic Kidney Disease and Sarcopenia in Korean Aged 40 Years and Older Using the Korea National Health and Nutrition Examination Surveys (KNHANES IV-2, 3, and V-1, 2), 2008–2011. *PLoS One.* 2015;10(6):1-11.
111. Morse CI, Thom JM, Birch KM, Narici MV. Changes in triceps surae muscle architecture with sarcopenia. *Acta Physiol Scand.* 2005;183(3):291-298.
112. Muraki S. Transdisciplinary approach for sarcopenia. Physical activity and sarcopenia. *Clinical Calcium.* 2014;24(10):1449-1456.
113. Nai-Hsin M, Chia-Ing L, Chiu-Shong L, et al. Sarcopenia defined by combining height- and weight-adjusted skeletal muscle indices is closely associated with poor physical performance. *J Aging Phys Act.* 2015;23(4):597-606.
114. Newman AB, Kupelian V, Visser M, et al. Sarcopenia: alternative definitions and associations with lower extremity function. *J Am Geriatr Soc.* 2003;51(11):1602.
115. Oh C, Jeon BH, Reid Storm SN, Jho S, No J-K. The most effective factors to offset sarcopenia and obesity in the older Korean: physical activity, vitamin D, and protein intake. *Nutrition.* 2017;33:169-173.
116. Ordóñez M, Chulvi Medrano I, Heredia Elvar JR, Moral Gonzalez S, Marcos Becerro JF, Da Silva Grigogolletto ME. Sarcopenia and resistance training: actual evidence. *J Sport Health Sci.* 2013;5(1):7-24.
117. Osuna-Pozo CM, Serra-Rexach JA, Vina J, et al. Prevalence of sarcopenia in geriatric outpatients and nursing homes. The ELLI study. *Rev Esp Geriatr Gerontol.* 2014;49(2):72-76.
118. Padilla Colón CJ, Sánchez Collado P, Cuevas MJ. Benefits of strength training for the prevention and treatment of sarcopenia. *Nutr Hosp.* 2014;29(5):979-988.
119. Park H, Park S, Shephard RJ, Aoyagi Y. Yearlong physical activity and sarcopenia in older adults: the Nakanajo Study. *Eur J Appl Physiol.* 2010;109(5):953-961.
120. Parra-Rodriguez L, Szlejf C, Garcia-Gonzalez AI, Malmstrom TK, Cruz-Arenas E, Rosas-Carrasco O. Cross-cultural adaptation and validation of the Spanish-

- language version of the SARC-F to assess sarcopenia in Mexican community-dwelling older adults. *J Am Med Dir Assoc*. 2016;17(12):1142-1146.
121. Patel HP, Jameson KA, Syddall HE, et al. Developmental influences, muscle morphology, and sarcopenia in community-dwelling older men. *J Gerontol A Biol Sci Med Sci*. 2012;67A(1):82-87.
  122. Patiño Viliada FA, Arboleda Franco SA, de Paz Fernández JA. Sarcopenia in community-dwelling persons over 60 years of age from a northern Spanish city: relationship between diagnostic criteria and association with the functional performance. *Nutr Hosp*. 2015;31(5):2154-2160.
  123. Payette H, Roubenoff R, Jacques PF, et al. Insulin-like growth factor-1 and interleukin 6 predict sarcopenia in very old community-living men and women: the Framingham Heart Study. *J Am Geriatr Soc*. 2003;51(9):1237-1243.
  124. Peláez RB. Global therapeutic approach to sarcopenia. *Nutr Hosp*. 2006;21:51-60.
  125. Phillips T, Leeuwenburgh C. Muscle fiber specific apoptosis and TNF-alpha signaling in sarcopenia are attenuated by life-long calorie restriction. *Faseb J*. 2005;19(6):668-670.
  126. Ping Z, Yiwen H, Jing P, et al. Sarcopenia-related features and factors associated with lower muscle strength and physical performance in older Chinese: a cross sectional study. *JGAG*. 2016;12(1):23-23.
  127. Piovezan RD, Abucham J, dos Santos RVT, Mello MT, Tufik S, Poyares D. The impact of sleep on age-related sarcopenia: Possible connections and clinical implications. *Ageing Res Rev*. 2015;23, Part B:210-220.
  128. Prado CMM, Mourtzakis M, Baracos VE, Reiman T, Sawyer MB, McCargar LJ. Overweight and obese patients with solid tumors may have sarcopenia, poor prognosis and early features of cachexia. *Int J Body Compos Res*. 2010;8(1):7-15.
  129. Pugh TD, Conklin MW, Evans TD, et al. A shift in energy metabolism anticipates the onset of sarcopenia in rhesus monkeys. *Aging Cell*. 2013;12(4):672-681.
  130. Reiss J, Iglseider B, Kreutzer M, et al. Case finding for sarcopenia in geriatric inpatients: performance of bioimpedance analysis in comparison to dual X-ray absorptiometry. *JGAG*. 2016;12(1):25-26.
  131. Rolland Y, Lauwers-Cances V, Cournot M, et al. Sarcopenia, calf circumference, and physical function of elderly women: a cross-sectional study. *J Am Geriatr Soc*. 2003;51(8):1120-1124.
  132. Roth SM, Zmuda JM, Cauley JA, Shea PR, Ferrell RE, Faulkner JA. Vitamin D receptor genotype is associated with fat-free mass and sarcopenia in elderly men. *J Gerontol A Biol Sci Med Sci*. 2004;59A(1):10-15.
  133. Samper-Ternent R, Reyes-Ortiz C, Ottenbacher KJ, Cano CA. Frailty and sarcopenia in Bogotá: results from the SABE Bogotá Study. *Aging Clin Exp Res*. 2016.
  134. Sanada K, Iemitsu M, Murakami H, et al. Adverse effects of coexistence of sarcopenia and metabolic syndrome in Japanese women. *Eur J Clin Nutr*. 2012;66(10):1093-1098.
  135. Sanada K, Miyachi M. A Cross-sectional study of sarcopenia in Japanese men and women. *Advances in Exercise & Sports Physiology*. 2012;18(2):27-32.

136. Savas S, Kilavuz A, Yilmaz M, Ozturk M, Sarac F, Akcicek F. P379: A cross sectional study – the prevalence of sarcopenia in internal medicine department in relation with nutritional, functional status and physical activity. *Eur Geriatr Med.* 2014;5, Supplement 1:S200-S201.
137. Sayer AA, Syddall HE, Gilbody HJ, Dennison EM, Cooper C. Does sarcopenia originate in early life? Findings from the Hertfordshire Cohort Study. *J Gerontol A Biol Sci Med Sci.* 2004;59A(9):930-934.
138. Scott D, Blizzard L, Fell J, Ding C, Winzenberg T, Jones G. A prospective study of the associations between 25-hydroxy-vitamin D, sarcopenia progression and physical activity in older adults. *Clin Endocrinol (Oxf).* 2010;73(5):581-587.
139. Scott D, Blizzard L, Fell J, Giles G, Jones G. Associations between dietary nutrient intake and muscle mass and strength in community-dwelling older adults: the Tasmanian Older Adult Cohort Study. *J Am Geriatr Soc.* 2010;58(11):2129-2134.
140. Seara Pitanga CP, Gondim Pitanga FJ, Calçada Dias Gabriel RE, Rodrigues Moreira MH. Association and discriminatory power of physical activity for the prevention of sarcopenia in postmenopausal women. *Motricidade.* 2015;11(3):114-122.
141. Seene T, Kaasik P. Muscle weakness in the elderly: role of sarcopenia, dynapenia, and possibilities for rehabilitation. *Eur Rev Aging Phys Act.* 2012;9(2):109-117.
142. Seo JA, Cho H, Eun CR, et al. Association between visceral obesity and sarcopenia and vitamin D deficiency in older Koreans: the Ansan Geriatric Study. *J Am Geriatr Soc.* 2012;60(4):700-706.
143. Silva Neto LS, Karnikowski MGO, Tavares AB, Lima RM. Association between sarcopenia, sarcopenic obesity, muscle strength and quality of life variables in elderly women. *Braz J Phys Ther.* 2012;16(5):360-367.
144. Singh H, Kim D, Kim E, et al. Jump test performance and sarcopenia status in men and women, 55 to 75 years of age. *J Geriatr Phys Ther.* 2014;37(2):76-82.
145. Singh MAF, Singh NA, Hansen RD, et al. Methodology and baseline characteristics for the Sarcopenia and Hip Fracture Study: a 5-year prospective study. *J Gerontol A Biol Sci Med Sci.* 2009;64A(5):568-574.
146. Sjöblom S, Suuronen J, Rikkonen T, Honkanen R, Kröger H, Sirola J. Relationship between postmenopausal osteoporosis and the components of clinical sarcopenia. *Maturitas.* 2013;75(2):175-180.
147. Song DS, Chang UI, Choi S, et al. Heavy alcohol consumption with alcoholic liver disease accelerates sarcopenia in elderly Korean males: the Korean National Health and Nutrition Examination Survey 2008-2010. *PLoS One.* 2016;11(9):1-14.
148. Soucek O, Komrska V, Hlavka Z, et al. Boys with haemophilia have low trabecular bone mineral density and sarcopenia, but normal bone strength at the radius. *Haemophilia.* 2012;18(2):222-228.
149. Spira D, Buchmann N, Nikolov J, et al. Association of low lean mass with frailty and physical performance: a comparison between two operational definitions of sarcopenia-data from the Berlin Aging Study II (BASE-II). *J Gerontol A Biol Sci Med Sci.* 2015;70(6):779-784.

150. Steffl M, Bohannon RW, Houdova V, et al. Association between clinical measures of sarcopenia in a sample of community-dwelling women. *Isokinet Exerc Sci*. 2015;23(1):41-44.
151. Subramaniam K, Fallon K, Ruut T, et al. Infliximab reverses inflammatory muscle wasting (sarcopenia) in Crohn's disease. *Aliment Pharmacol Ther*. 2015;41(5):419-428.
152. Šteffl M, Houdová V, Petr M, Kohlíková Eva, Holmerová Iva. Selected problems with diagnostics of sarcopenia in long-term-care facilities for the elderly. *Acta Universitatis Carolinae: Kinanthropologica*. 2013;49(1):56-64.
153. Šteffl M, Petr M, Kohlíková Eva. The role of amino acid supplementation in sarcopenia treatment. *Acta Universitatis Carolinae: Kinanthropologica*. 2012;48(2):18-26.
154. Takeo T, Ken S, Takeshi K, et al. Profile of plasma amino acids values as a predictor of sepsis in patients following living donor liver transplantation: Special reference to sarcopenia and postoperative early nutrition. *Hepatol Res*. 2015;45(12):1170-1177.
155. Tanimoto Y, Watanabe M, Sun W, et al. Association of sarcopenia with functional decline in community-dwelling elderly subjects in Japan. *Geriatr Gerontol Int*. 2013;13(4):958-963.
156. Tay L, Ding YY, Leung BP, et al. Sex-specific differences in risk factors for sarcopenia amongst community-dwelling older adults. *Age (Dordr)*. 2015;37(6):121-121.
157. Tengvall M, Ellegård L, Lissner L, Bosaeus I. Longitudinal changes in body composition and sarcopenia assessed by bioelectrical impedance spectroscopy in elderly Swedes. *Int J Body Compos Res*. 2010;8(4):139-145.
158. Tolea MI, Galvin JE. Sarcopenia and impairment in cognitive and physical performance. *Clin Interv Aging*. 2015;10:663-671.
159. Van Kan GA, Cesari M, Gillette-Guyonnet S, et al. Sarcopenia and cognitive impairment in elderly women: Results from the EPIDOS cohort. *Age and Ageing*. 2013;42(2):196-202.
160. Velazquez Alva Mdel C, Irigoyen Camacho ME, Delgadillo Velazquez J, Lazarevich I. The relationship between sarcopenia, undernutrition, physical mobility and basic activities of daily living in a group of elderly women of Mexico City. *Nutr Hosp*. 2013;28(2):514-521.
161. Verschueren S, Gielen E, O'Neill TW, et al. Sarcopenia and its relationship with bone mineral density in middle-aged and elderly European men. *Osteoporos Int*. 2013;24(1):87-98.
162. Viana JU, Silva SLA, Torres JL, Dias JMD, Pereira LSM, Dias RC. Influence of sarcopenia and functionality indicators on the frailty profile of community-dwelling elderly subjects: a cross-sectional study. *Braz J Phys Ther*. 2013;17(4):373-381.
163. Visser M, Deeg DJH, Lips P. Low vitamin D and high parathyroid hormone levels as determinants of loss of muscle strength and muscle mass (sarcopenia): the

- Longitudinal Aging Study Amsterdam. *J Clin Endocrinol Metab.* 2003;88(12):5766-5772.
164. Wang T, Feng X, Zhou J, et al. Type 2 diabetes mellitus is associated with increased risks of sarcopenia and pre-sarcopenia in Chinese elderly. *Sci Rep.* 2016; 6: 38937.
  165. Wen X, An P, Chen WC, Lv Y, Fu Q. Comparisons of sarcopenia prevalence based on different diagnostic criteria in Chinese older adults. *J Nutr Health Aging.* 2015;19(3):342-347.
  166. Won Seok H, Hyun Wook B, Ju Hee K, et al. The Prevalence of Sarcopenia in Korean Hospitalized Elderly. *J Korean Geriatr Soc.* 2015;19(4):235-240.
  167. Woo J, Leung J, Sham A, Kwok T. Defining sarcopenia in terms of risk of physical limitations: a 5-year follow-up study of 3,153 Chinese men and women. *J Am Geriatr Soc.* 2009;57(12):2224-2231.
  168. Woods JL, Iuliano-Burns S, King SJ, Strauss BJ, Walker KZ. Poor physical function in elderly women in low-level aged care is related to muscle strength rather than to measures of sarcopenia. *Clin Interv Aging.* 2011;6:67-76.
  169. Wu C-H, Chen K-T, Hou M-T, et al. Prevalence and associated factors of sarcopenia and severe sarcopenia in older Taiwanese living in rural community: The Tianliao Old People study 04. *Geriatr Gerontol Int.* 2014;14:69-75.
  170. Wu IC, Lin CC, Hsiung CA, et al. Epidemiology of sarcopenia among community-dwelling older adults in Taiwan: a pooled analysis for a broader adoption of sarcopenia assessments. *Geriatr Gerontol Int.* 2014;1:52-60.
  171. Yoo KD, Jun DW, Lee KN, et al. Sarcopenia is a risk factor for elevated aminotransferase in men independently of body mass index, dietary habits, and physical activity. *Dig Liver Dis.* 2015;47(4):303-308.
  172. Yoshida D, Suzuki T, Shimada H, et al. Using two different algorithms to determine the prevalence of sarcopenia. *Geriatr Gerontol Int.* 2014;14:46-51.
  173. Kim M, Kim MK. Physical activity and sedentary behavior patterns according to body composition phenotypes of sarcopenia and obesity in frail older women. *Korean J Obes.* 2014;23(3):194-202.
  174. Lee SK, Lee JA, Kim JY, Kim YZ, Park HS. The risk factors of sarcopenia among Korean elderly men: based on 2009 Korean National Health and Nutrition Examination Survey Data. *Korean J Obes.* 2014;23(1):23-31.
